# Supplementary material
Source: publisher figshare collection journal article supplement (https://geolsoc.figshare.com/ndownloader/files/22643036)
Supplement: Supplementary file 1 [file 22643036]

## Sheet: Calculations
Table S6- Zircon Lu-Hf and O isotope composition of the Paleogene rocks from oceanic tract of NW Iran.
	Input data										Calculation
	Used Age	1SE	176Yb/177Hf	2SE	176Lu/177Hf	2SE	176Hf/177Hf	2SE	delta O18	2SE	(176Hf/177)i	(176Hf/177Hf)1	(176Hf/177Hf)2	(176Hf/177Hf)3		εHf(0)	2σ	εHf(t)	2σ	TDM	TDM11	TDM12	TDM13	TNCC	TNCC1	TNCC2	TNCC3	TDM21	TDM22	TDM23	fLu/Hf
												UCC Lu/Hf = 0.0093	CC Lu/Hf = 0.015	LCC Lu/Hf = 0.022							UCC	CC	LCC		UCC	CC	LCC
KN14-3 01	39.5	0.3	0.0456922	6.60873e-05	0.00180142	2.86297e-06	0.283188	3.02042e-05	5.71258	0.129364	0.283186	0.283193	0.283197	0.283203		14.7005	1.02707	15.521	1.02728	91.1159	104.408	120.208	154.619	-64.1679	-91.8118	-125.195	-199.958	104.357	119.886	153.648	-0.94574
KN14-3 02	39.5	0.3	0.217596	0.00435419	0.00832516	0.000148815	0.283192	3.81882e-05	5.56547	0.210931	0.283186	0.283193	0.283197	0.283202		14.8551	1.02708	15.5054	1.02728	103.089	105.218	121.213	156.053	-86.601	-90.9725	-124.142	-198.425	105.202	120.933	155.135	-0.749242
KN14-3 03	39.5	0.3	0.0855486	0.00094718	0.00328495	3.42332e-05	0.283115	3.03835e-05	5.47321	0.279364	0.283112	0.283119	0.283123	0.283129		12.1197	1.0268	12.9013	1.02701	205.963	240.307	289.108	395.295	47.4574	49.1573	51.6084	57.0917	240.212	288.27	392.754	-0.901056
KN14-3 04	39.5	0.3	0.0918661	0.000452052	0.00350915	1.59161e-05	0.283054	3.65037e-05	6.38085	0.233234	0.283051	0.283058	0.283062	0.283067		9.96444	1.02658	10.74	1.02679	300.399	352.167	428.053	593.045	143.761	165.18	197.036	268.236	352.076	426.918	589.634	-0.894303
KN14-3 05	39.5	0.3	0.0768283	0.0003235	0.00309704	7.71117e-06	0.283132	4.04966e-05	6.5509	0.254879	0.28313	0.283136	0.283141	0.283146		12.7279	1.02687	13.5144	1.02707	178.87	208.531	249.625	339.062	20.4049	16.197	10.2802	-2.95953	208.441	248.892	336.837	-0.906716
KN14-3 06	39.5	0.3	0.11046	0.00283408	0.00419401	0.000107093	0.283096	3.403e-05	6.43221	0.232525	0.283093	0.283099	0.283104	0.283109		11.4456	1.02674	12.2034	1.02694	241.149	276.452	334.013	459.229	79.4135	86.6487	98.6104	125.362	276.363	333.076	456.378	-0.873674
KN14-3 07	39.5	0.3	0.0832464	0.000170233	0.00326219	5.50409e-06	0.283047	3.80121e-05	6.29008	0.225271	0.283044	0.283051	0.283055	0.283061		9.71945	1.02656	10.5014	1.02676	308.794	364.5	443.368	614.828	153.546	177.971	213.064	291.491	364.41	442.205	611.342	-0.901741
KN14-3 08	39.5	0.3	0.0793213	0.000480245	0.00306344	1.74511e-05	0.28312	3.89612e-05	6.02627	0.233714	0.283118	0.283124	0.283129	0.283134		12.3003	1.02682	13.0877	1.02703	196.962	230.649	277.108	378.205	39.2043	39.1388	39.0471	38.842	230.553	276.299	375.754	-0.907728
KN14-3 09	39.5	0.3	0.166111	0.00139862	0.00615662	5.09551e-05	0.283149	3.69181e-05	5.50014	0.157781	0.283145	0.283151	0.283156	0.283161		13.3357	1.02693	14.0425	1.02713	167.356	181.149	215.596	290.583	-7.01157	-12.2069	-25.3402	-54.7339	181.095	214.997	288.706	-0.81456
KN14-3 10	39.5	0.3	0.150978	0.000587862	0.00581932	2.41675e-05	0.283186	3.87274e-05	5.30514	0.215889	0.283182	0.283189	0.283193	0.283198		14.6473	1.02706	15.363	1.02726	104.809	112.615	130.411	169.167	-69.7737	-83.2982	-114.514	-184.418	112.581	130.079	168.122	-0.824719
KN14-3 11	39.5	0.3	0.0806933	0.00247816	0.00312191	9.3617e-05	0.283209	3.24931e-05	6.48906	0.25121	0.283207	0.283214	0.283218	0.283223		15.4662	1.02715	16.2524	1.02735	61.6948	66.4057	72.9576	87.2319	-100.472	-131.235	-174.661	-271.943	66.3851	72.8224	86.8178	-0.905967
KN14-3 12	39.5	0.3	0.0919222	0.000734634	0.00349736	2.6509e-05	0.283078	3.62505e-05	7.0122	0.225287	0.283076	0.283083	0.283087	0.283092		10.8295	1.02667	11.6055	1.02688	262.954	307.4	372.456	513.943	105.215	118.749	138.847	183.783	307.304	371.426	510.835	-0.894658
KN14-3 13	39.5	0.3	0.0775952	0.000881983	0.00298524	2.82905e-05	0.283105	3.36156e-05	5.5525	0.250921	0.283103	0.28311	0.283114	0.283119		11.7742	1.02677	12.5636	1.02697	218.94	257.8	310.841	426.24	62.2092	67.3013	74.3561	90.1359	257.7	309.945	423.532	-0.910083
KN14-3 14	39.5	0.3	0.12836	0.0016954	0.00481577	6.26728e-05	0.283105	3.06973e-05	6.16491	0.196335	0.283101	0.283108	0.283112	0.283117		11.7623	1.02677	12.5039	1.02697	231.384	260.892	314.683	431.709	66.2496	70.5088	78.3772	95.9765	260.809	313.799	429.005	-0.854947
KN14-3 15	39.5	0.3	0.0863394	0.000270344	0.00335647	1.03635e-05	0.283141	2.90736e-05	5.91057	0.210057	0.283138	0.283145	0.28315	0.283155		13.0477	1.0269	13.8275	1.0271	166.413	192.297	229.451	310.323	6.35637	-0.642879	-10.8376	-33.6524	192.214	228.779	308.276	-0.898901
KN14-3 16	39.5	0.3	0.0820964	0.00047168	0.00299151	1.65324e-05	0.283144	3.45324e-05	5.76445	0.264645	0.283142	0.283149	0.283153	0.283158		13.1685	1.02691	13.9578	1.02712	159.551	185.541	221.055	298.362	0.983689	-7.65019	-19.6254	-46.4265	185.457	220.405	296.385	-0.909894
KN14-3 17	39.5	0.3	0.0697842	0.000436316	0.0027917	1.75331e-05	0.283131	3.02431e-05	6.56985	0.195487	0.283129	0.283136	0.28314	0.283145		12.6986	1.02686	13.4931	1.02707	178.579	209.635	250.996	341.015	21.5025	17.3413	11.7151	-0.874225	209.541	250.256	338.773	-0.915913
KN14-3 18	39.5	0.3	0.13025	0.000593414	0.00489384	2.08432e-05	0.283174	2.72162e-05	5.30564	0.133671	0.283171	0.283177	0.283182	0.283187		14.222	1.02702	14.9618	1.02722	121.099	133.443	156.302	206.079	-47.9879	-61.6924	-87.4096	-144.99	133.394	155.876	204.754	-0.852595
KN14-14 01	39.7	0.5	0.058245	0.00170986	0.00239125	6.57217e-05	0.283241	3.38285e-05	5.43331	0.206913	0.283239	0.283246	0.28325	0.283256		16.5872	1.02726	17.3966	1.02751	13.3259	7.06237	-0.890831	-18.2256	-146.908	-192.798	-251.976	-384.609	7.09275	-0.714616	-17.6888	-0.927974
KN14-14 02	39.7	0.5	0.0578022	0.000608083	0.00234711	2.4595e-05	0.283172	3.17784e-05	5.35551	0.213567	0.28317	0.283177	0.283182	0.283187		14.1531	1.02701	14.9634	1.02726	115.444	133.525	156.355	206.07	-41.5291	-61.6077	-87.3542	-145	133.459	155.908	204.715	-0.929304
KN14-14 03	39.7	0.5	0.0911229	0.000269594	0.00367389	9.65306e-06	0.283209	3.27314e-05	5.27073	0.214889	0.283206	0.283213	0.283217	0.283223		15.4523	1.02715	16.228	1.02739	63.2812	67.8391	74.6912	89.6196	-101.49	-129.748	-172.846	-269.392	67.8189	74.5517	89.1893	-0.889341
KN14-14 04	39.7	0.5	0.114822	0.000175535	0.00447895	6.34142e-06	0.283152	3.34717e-05	5.33457	0.197681	0.283149	0.283156	0.28316	0.283165		13.4527	1.02694	14.2071	1.02718	153.882	172.776	205.141	275.601	-12.0295	-20.8923	-36.284	-70.7348	172.708	204.555	273.795	-0.865092
KN14-14 05	39.7	0.5	0.0633257	0.000398631	0.00258735	1.26915e-05	0.283101	3.42369e-05	5.72056	0.29762	0.283099	0.283105	0.28311	0.283115		11.6175	1.02675	12.4212	1.027	223.115	265.336	320.154	439.415	68.3011	75.1179	84.1046	104.205	265.232	319.232	436.635	-0.922068
KN14-14 06	39.7	0.5	0.0784861	0.000260914	0.00310087	1.01408e-05	0.283155	2.79614e-05	5.3231	0.208617	0.283153	0.28316	0.283164	0.283169		13.5433	1.02695	14.3338	1.02719	144.007	166.201	196.97	263.957	-15.5419	-27.7126	-44.8382	-83.1719	166.124	196.395	262.207	-0.9066
KN14-14 07	39.7	0.5	0.10428	0.00106848	0.00401764	3.86741e-05	0.283249	3.58066e-05	5.52557	0.193169	0.283246	0.283253	0.283258	0.283263		16.8842	1.02729	17.651	1.02753	0.87378	-6.17714	-17.3583	-41.731	-167.558	-206.533	-269.218	-409.723	-6.14082	-17.1168	-40.9798	-0.878987
KN14-14 08	39.7	0.5	0.0793904	0.000335507	0.00317334	1.12217e-05	0.283241	3.24209e-05	5.31013	0.263464	0.283238	0.283245	0.283249	0.283255		16.57	1.02726	17.3589	1.0275	14.3601	9.02355	1.54842	-14.7441	-149.503	-190.763	-249.423	-380.889	9.04973	1.71094	-14.2445	-0.904417
KN14-14 09	39.7	0.5	0.0850341	0.000222453	0.00347056	9.13709e-06	0.28319	3.76953e-05	5.73951	0.169715	0.283187	0.283194	0.283199	0.283204		14.7814	1.02708	15.5624	1.02732	91.9607	102.424	117.691	150.946	-70.9353	-93.8707	-127.829	-203.881	102.381	117.389	150.019	-0.895465
KN14-14 10	39.7	0.5	0.0844953	0.000429587	0.00332253	1.49048e-05	0.283172	3.34441e-05	5.46772	0.186666	0.283169	0.283176	0.28318	0.283186		14.1345	1.02701	14.9192	1.02725	119.451	135.819	159.206	210.134	-41.8905	-59.2286	-84.3699	-140.659	135.757	158.757	208.761	-0.899924
KN14-14 11	39.7	0.5	0.069451	0.000503463	0.00290789	2.01048e-05	0.283255	3.09223e-05	5.13309	0.156052	0.283253	0.28326	0.283264	0.283269		17.0893	1.02731	17.8852	1.02756	-7.90409	-18.3665	-32.5204	-63.3759	-171.185	-219.179	-285.092	-432.85	-18.3128	-32.2032	-62.4025	-0.912413
KN14-14 12	39.7	0.5	0.068687	0.000299339	0.00278677	1.26369e-05	0.283181	3.18289e-05	5.19842	0.239634	0.283178	0.283185	0.28319	0.283195		14.4466	1.02704	15.2454	1.02729	104.412	118.885	138.156	180.125	-54.8889	-76.7945	-106.406	-172.713	118.829	137.776	178.968	-0.916061
KN14-14 13	39.7	0.5	0.109645	0.00145318	0.0042956	5.46734e-05	0.283215	3.62146e-05	5.44777	0.266216	0.283212	0.283219	0.283223	0.283228		15.6661	1.02717	16.4254	1.02741	54.9506	57.5729	61.9256	71.4094	-113.179	-140.398	-186.211	-288.846	57.5608	61.8373	71.135	-0.870614
KN14-14 14	39.7	0.5	0.0770291	0.000107391	0.00309272	5.07647e-06	0.283281	2.79499e-05	5.10865	0.139165	0.283279	0.283286	0.28329	0.283295		18.0031	1.02741	18.7942	1.02765	-47.1657	-65.7132	-91.4222	-147.487	-212.53	-268.299	-346.765	-522.727	-65.6095	-90.8244	-145.645	-0.906846
KN14-14 15	39.7	0.5	0.0809639	0.0034626	0.00319114	0.000128548	0.283241	4.28967e-05	5.39641	0.127603	0.283239	0.283246	0.28325	0.283255		16.5972	1.02726	17.3856	1.02751	13.1995	7.63467	-0.179028	-17.2096	-150.785	-192.204	-251.231	-383.524	7.66205	-0.00901066	-16.6868	-0.903881
KN14-14 16	39.7	0.5	0.0747213	8.88217e-05	0.00295512	3.91143e-06	0.283225	3.41067e-05	5.23433	0.26118	0.283223	0.28323	0.283234	0.283239		16.0243	1.0272	16.8188	1.02745	37.5795	37.1172	36.488	35.117	-124.537	-161.619	-212.842	-327.618	37.1193	36.5014	35.158	-0.91099
KN14-14 17	39.7	0.5	0.0829877	0.000503924	0.00328439	2.01019e-05	0.283173	3.33708e-05	4.95705	0.195252	0.283171	0.283178	0.283182	0.283187		14.1825	1.02702	14.9682	1.02726	117.257	133.276	156.045	205.627	-43.9722	-61.8666	-87.6791	-145.472	133.215	155.606	204.287	-0.901073
KN14-14 18	39.7	0.5	0.0798922	0.00113994	0.00314984	4.37594e-05	0.283193	3.33334e-05	5.33157	0.226854	0.28319	0.283197	0.283202	0.283207		14.8817	1.02709	15.6711	1.02733	86.8229	96.7768	110.671	140.935	-74.7054	-99.7286	-135.179	-214.575	96.7361	110.393	140.083	-0.905125
KH14-39-01	36.2	0.2	0.0193188	0.00103385	0.000683808	3.98341e-05	0.282718	3.05252e-05			0.282717	0.282723	0.282727	0.282732		-1.9241	1.02536	-1.14676	1.02555	750.802	960.571	1183.34	1665.59	618.983	796.071	987.254	1412.52	961.449	1182.99	1664.64	-0.979403
KH14-39-02	36.3	0.3	0.0510346	0.000273518	0.00192266	1.14849e-05	0.282678	2.94637e-05			0.282676	0.282683	0.282686	0.282691		-3.33845	1.02522	-2.58878	1.02541	833.966	1034.31	1274.63	1794.59	699.973	872.522	1082.73	1550.04	1035.28	1274.47	1794.5	-0.942089
KH14-39-03	36.3	0.2	0.0448155	0.0006776	0.00170463	2.76168e-05	0.282636	3.41984e-05			0.282635	0.282641	0.282645	0.28265		-4.81414	1.02507	-4.05935	1.02525	888.988	1109.33	1367.49	1925.75	757.408	950.29	1179.84	1689.85	1110.55	1367.76	1926.97	-0.948656
KH14-39-04	36.8	0.5	0.0402583	0.000167186	0.00154916	4.81344e-06	0.28267	2.88339e-05			0.282669	0.282675	0.282679	0.282684		-3.60502	1.02519	-2.83596	1.02542	836.366	1047.33	1290.63	1816.99	703.838	886.019	1099.46	1573.92	1048.38	1290.58	1817.17	-0.953339
KH14-39-05	38	0.3	0.0278378	0.000288971	0.00106162	1.18299e-05	0.282728	2.71315e-05			0.282727	0.282733	0.282737	0.282742		-1.57165	1.0254	-0.765093	1.0256	744.248	942.511	1160.55	1632.61	610.872	777.347	963.411	1377.35	943.3	1160.06	1631.33	-0.968023
KH14-39-06	36.8	0.4	0.0353418	0.000119785	0.0013385	4.5323e-06	0.282697	3.60995e-05			0.282697	0.282703	0.282707	0.282712		-2.63514	1.02529	-1.86088	1.0255	792.609	997.547	1228.99	1729.88	659.599	834.405	1034.99	1481.05	998.467	1228.73	1729.33	-0.959684
KH14-39-07	37.2	0.3	0.0505822	0.0022157	0.00180413	6.97702e-05	0.282687	3.01184e-05			0.282686	0.282692	0.282696	0.282701		-3.01181	1.02525	-2.2406	1.02545	817.974	1017.26	1253.3	1764.08	683.962	854.845	1060.43	1517.52	1018.19	1253.07	1763.74	-0.945659
KH14-39-08	38.1	0.3	0.0373093	0.000286383	0.00142407	1.02719e-05	0.282657	2.55709e-05			0.282656	0.282663	0.282667	0.282672		-4.0637	1.02514	-3.26435	1.02535	852.053	1070.24	1318.67	1856.07	720.437	909.764	1128.79	1615.58	1071.36	1318.76	1856.64	-0.957106
KH14-39-09	37.1	0.3	0.0525201	0.000711971	0.00192154	2.11121e-05	0.28266	2.31861e-05			0.282659	0.282666	0.28267	0.282674		-3.94344	1.02516	-3.17725	1.02535	858.666	1064.99	1312.41	1847.64	725.398	904.324	1122.24	1606.59	1066.04	1312.4	1848.03	-0.942122
KH14-39-10	37.3	0.3	0.0256868	0.000198533	0.000934757	9.11585e-06	0.282655	2.28307e-05			0.282654	0.28266	0.282664	0.282669		-4.15047	1.02514	-3.35586	1.02533	844.464	1074.26	1323.84	1863.71	714.399	913.936	1134.2	1623.72	1075.46	1324.04	1864.47	-0.971845
KH14-39-11	37.7	0.3	0.0443521	0.000307203	0.00163494	1.04734e-05	0.282647	2.16871e-05			0.282646	0.282653	0.282657	0.282662		-4.41451	1.02511	-3.62884	1.02531	871.122	1088.51	1341.38	1888.31	739.282	928.703	1152.54	1649.94	1089.66	1341.54	1889.15	-0.950755
KH14-39-12	38.2	0.4	0.0281851	9.10978e-05	0.00107683	3.23194e-06	0.282649	2.25773e-05			0.282649	0.282655	0.282659	0.282664		-4.33229	1.02512	-3.5221	1.02534	854.916	1083.47	1335.02	1879.13	724.639	923.477	1145.89	1640.15	1084.68	1335.24	1880	-0.967565
KH14-39-13	37.6	0.3	0.0605928	0.00180226	0.002206	5.4838e-05	0.282686	2.46454e-05			0.282684	0.282691	0.282695	0.2827		-3.04773	1.02525	-2.27821	1.02545	828.466	1019.51	1255.99	1767.71	693.233	857.17	1063.23	1521.38	1020.39	1255.71	1767.31	-0.933554
KH14-39-14	37	0.3	0.00862057	8.74328e-05	0.000313072	4.06774e-06	0.282661	1.94403e-05			0.282661	0.282667	0.282671	0.282676		-3.92478	1.02516	-3.12135	1.02536	821.949	1062.06	1308.81	1842.59	693.435	901.283	1118.47	1601.21	1063.29	1309.03	1843.28	-0.99057
KH14-39-15	37.3	0.3	0.0533678	0.000423779	0.00203444	1.63004e-05	0.28268	2.44901e-05			0.282679	0.282685	0.282689	0.282694		-3.25159	1.02523	-2.484	1.02542	832.948	1029.77	1268.77	1785.89	698.502	867.812	1076.6	1540.77	1030.7	1268.56	1785.69	-0.938722
KH14-39-16	38	0.4	0.00106239	3.74611e-05	2.87298e-05	1.50881e-06	0.282679	2.26939e-05			0.282679	0.282686	0.28269	0.282695		-3.28993	1.02522	-2.45759	1.02544	791.219	1028.99	1267.63	1784	662.831	866.999	1075.41	1538.75	1030.14	1267.69	1784.16	-0.999135
KH14-39-17	37.9	0.3	0.00366503	0.000338666	0.000116362	1.15732e-05	0.28262	2.18151e-05			0.28262	0.282627	0.282631	0.282636		-5.36172	1.02501	-4.53393	1.02521	873.716	1134.81	1398.63	1969.07	747.316	976.696	1212.41	1736.01	1136.33	1399.33	1971.13	-0.996495
KH14-39-18	37.1	0.3	0.0108885	0.000221404	0.000355939	8.24974e-06	0.282622	2.13204e-05			0.282622	0.282629	0.282632	0.282637		-5.29334	1.02502	-4.4889	1.02522	876.495	1131.87	1395.19	1964.53	749.355	973.651	1208.8	1731.18	1133.35	1395.83	1966.5	-0.989279
KH14-39-19	37.2	0.3	0.0185826	0.000198524	0.000644927	8.42488e-06	0.282552	2.41788e-05			0.282552	0.282558	0.282562	0.282567		-7.77568	1.02476	-6.97637	1.02496	981.012	1258.55	1551.88	2185.57	855.81	1104.96	1372.65	1966.73	1260.48	1553.38	2190.18	-0.980574
KH14-39-20	36.8	0.3	0.00822934	5.4512e-05	0.000273313	1.7601e-06	0.28256	2.02394e-05			0.28256	0.282566	0.28257	0.282575		-7.49676	1.02479	-6.697	1.02499	960.655	1244.02	1534.01	2160.54	836.14	1089.91	1353.97	1940.06	1245.97	1535.48	2164.93	-0.991768
KH14-39-21	37.1	0.2	0.0296	7.79641e-05	0.00111466	2.11957e-06	0.282628	2.08676e-05			0.282628	0.282634	0.282638	0.282643		-5.08009	1.02504	-4.29423	1.02523	885.663	1121.95	1382.91	1947.2	756.127	963.367	1195.96	1712.71	1123.29	1383.36	1948.79	-0.966426
KH14-38-01	38.7	0.5	0.0331796	0.00066	0.000773695	1.8e-05	0.282661	8.3e-06			0.28266	0.282667	0.282671	0.282676		-3.92542	1.02516	-3.09684	1.0254	831.959	1062.18	1308.55	1841.52	702.112	901.406	1118.2	1600.07	1063.35	1308.69	1842.09	-0.976696
KH14-38-02	38.7	0.3	0.0771384	0.0067	0.00173332	0.00015	0.28268	9.9e-06			0.282679	0.282685	0.28269	0.282695		-3.2535	1.02523	-2.4494	1.02544	826.238	1029.13	1267.64	1783.73	692.732	867.151	1075.42	1538.46	1030.09	1267.47	1783.56	-0.947792
KH14-38-03	38.8	0.3	0.0664212	0.00022	0.00148151	4.3e-06	0.282638	7.9e-06			0.282637	0.282644	0.282648	0.282653		-4.7388	1.02508	-3.92629	1.02528	880.619	1104.56	1360.99	1915.55	749.615	945.343	1173.04	1678.97	1105.78	1361.26	1916.69	-0.955376
KH14-38-04	38.8	0.4	0.0707502	0.0017	0.00160027	3.6e-05	0.282633	1.3e-05			0.282632	0.282639	0.282643	0.282648		-4.91562	1.02506	-4.10617	1.02528	890.596	1113.73	1372.34	1931.57	759.446	954.848	1184.91	1696.05	1114.97	1372.64	1932.85	-0.951799
KH14-38-05	39.2	0.3	0.0638701	0.0036	0.00130911	8.2e-05	0.282554	1.6e-05			0.282553	0.28256	0.282564	0.282569		-7.70939	1.02477	-6.88429	1.02498	995.76	1255.47	1547.6	2178.72	868.676	1101.77	1368.18	1959.43	1257.26	1548.91	2182.98	-0.960569
KH14-38-06	39.3	0.3	0.120717	0.002	0.00252716	4.1e-05	0.282625	1e-05			0.282623	0.28263	0.282634	0.282639		-5.19853	1.02503	-4.40273	1.02523	925.154	1129.25	1391.42	1958.31	791.543	970.933	1204.86	1724.55	1130.39	1391.64	1959.62	-0.923881
KH14-38-07	39.4	0.6	0.0469526	0.0019	0.00108748	3.2e-05	0.282695	1.4e-05			0.282694	0.282701	0.282705	0.28271		-2.72304	1.02528	-1.88753	1.02555	790.832	1001	1232.65	1733.98	658.69	837.99	1038.82	1485.43	1001.95	1232.42	1733.49	-0.967245
KH14-38-08	39.6	0.3	0.0825884	0.0048	0.00176684	0.00012	0.282685	1.6e-05			0.282684	0.282691	0.282695	0.2827		-3.07668	1.02525	-2.25473	1.02546	819.789	1019.92	1256.02	1766.93	685.97	857.599	1063.27	1520.56	1020.85	1255.8	1766.6	-0.946782
KH14-38-09	39.7	0.3	0.0391585	0.00084	0.000865778	2.2e-05	0.282622	1.3e-05			0.282621	0.282628	0.282632	0.282638		-5.30463	1.02502	-4.45716	1.02523	888.75	1132.34	1395.15	1963.42	760.184	974.142	1208.77	1729.99	1133.74	1395.7	1965.21	-0.973922
KH14-38-10	39.8	0.4	0.110626	0.0096	0.00228931	0.0002	0.282606	1.6e-05			0.282604	0.282611	0.282615	0.282621		-5.87045	1.02496	-5.05832	1.0252	946.807	1163.04	1433.12	2016.97	814.738	1005.97	1248.47	1787.07	1164.33	1433.58	2018.97	-0.931045
KH14-38-11	39.8	0.3	0.0617873	0.004	0.00142718	7.3e-05	0.282678	1.4e-05			0.282677	0.282684	0.282688	0.282693		-3.32423	1.02522	-2.48922	1.02543	822.302	1032.05	1271	1788.01	689.819	870.177	1078.93	1543.03	1033.05	1270.88	1787.93	-0.957013
KH14-38-12	40.3	0.3	0.0343532	0.0024	0.000768945	5.3e-05	0.282655	1.3e-05			0.282654	0.282661	0.282666	0.282671		-4.13761	1.02514	-3.27465	1.02535	840.263	1072.54	1320.99	1858.44	710.667	912.146	1131.22	1618.1	1073.74	1321.19	1859.16	-0.976839
KH14-38-13	40.4	0.3	0.057821	0.0024	0.00128012	4.8e-05	0.282699	1.8e-05			0.282698	0.282705	0.282709	0.282715		-2.58159	1.0253	-1.72998	1.02551	789.218	993.764	1223.45	1720.55	656.326	830.483	1029.2	1471.12	994.669	1223.16	1719.91	-0.961442
KH14-38-14	40.8	0.4	0.0676816	0.0013	0.00148957	1.9e-05	0.282534	2.1e-05			0.282533	0.28254	0.282544	0.28255		-8.41667	1.0247	-7.56281	1.02493	1029.06	1291.23	1591.46	2239.89	902.295	1138.85	1414.03	2024.6	1293.12	1592.97	2244.88	-0.955133
KH14-38-15	41.6	0.4	0.0653836	0.0011	0.00144675	2.9e-05	0.282632	1.1e-05			0.282631	0.282638	0.282643	0.282648		-4.95099	1.02505	-4.07887	1.02529	888.352	1114.59	1372.74	1930.98	757.697	955.742	1185.33	1695.42	1115.84	1373.06	1932.27	-0.956423
KH14-38-16	42.6	0.5	0.0649656	0.0019	0.00145526	4.1e-05	0.282653	1.4e-05			0.282652	0.282659	0.282664	0.282669		-4.20834	1.02513	-3.31542	1.02539	858.602	1076.47	1325.31	1863.6	727.06	916.222	1135.73	1623.6	1077.59	1325.41	1864.19	-0.956167
KH14-38-17	46	1	0.097366	0.0062	0.00212401	0.00015	0.282615	1.3e-05			0.282613	0.282621	0.282626	0.282632		-5.55218	1.02499	-4.60841	1.02546	929.472	1145.11	1409.46	1981.02	797.514	987.382	1223.73	1748.76	1146.35	1409.81	1982.61	-0.936024
